# Supplementary material for: Donor Microbiota Composition and Housing Affect Recapitulation of Obese Phenotypes in a Human Microbiota-Associated Murine Model
Source: PubMed Central journal article supplement (PMC7937608; doi:10.3389/fcimb.2021.614218), 2021-02-22
Supplement: Image_2.pdf [file Image_2.pdf]

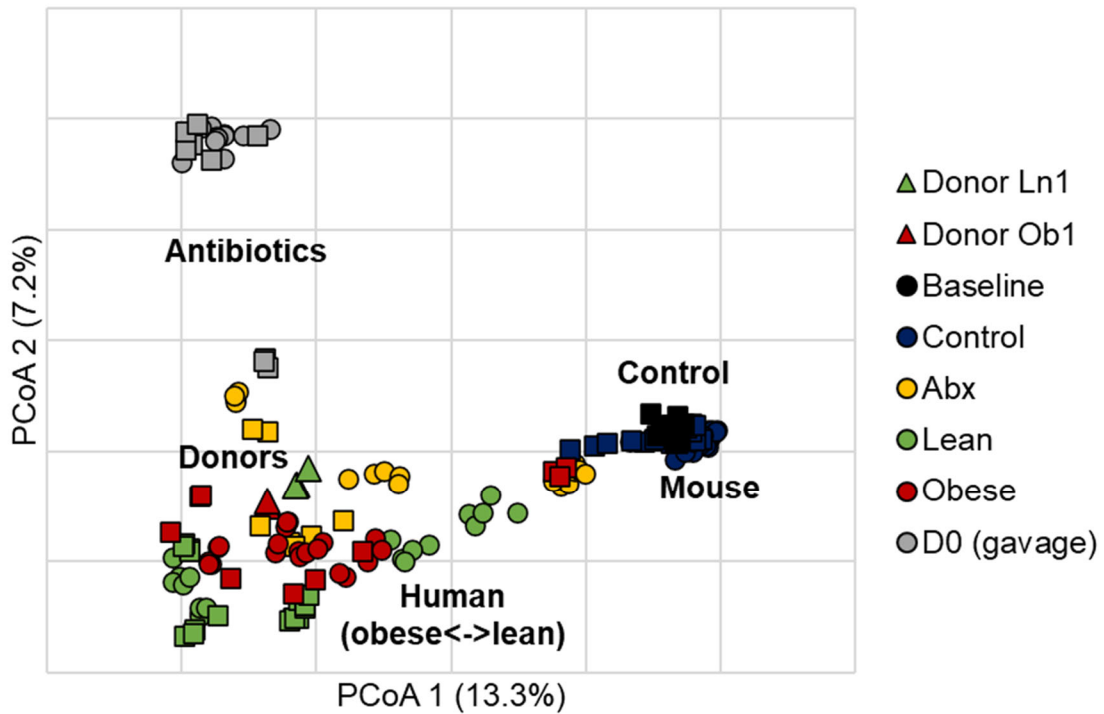

**Figure S2.** Principal coordinate analysis of Bray-Curtis dissimilarities among conventional mice associated with the first donor pair. Abx refers to the antibiotic control group following gavage with water. Circles (○) denote females and squares (□) denote males. Groups as denoted by color and text differed significantly in pairwise comparisons by ANOSIM (experimental  $R = 0.78$ ,  $P \leq 0.002$ , Bonferroni-adjusted  $\alpha=0.002$ ).
