# Supplementary material for: Donor Microbiota Composition and Housing Affect Recapitulation of Obese Phenotypes in a Human Microbiota-Associated Murine Model
Source: PubMed Central journal article supplement (PMC7937608; doi:10.3389/fcimb.2021.614218), 2021-02-22
Supplement: Image_5.pdf [file Image_5.pdf]

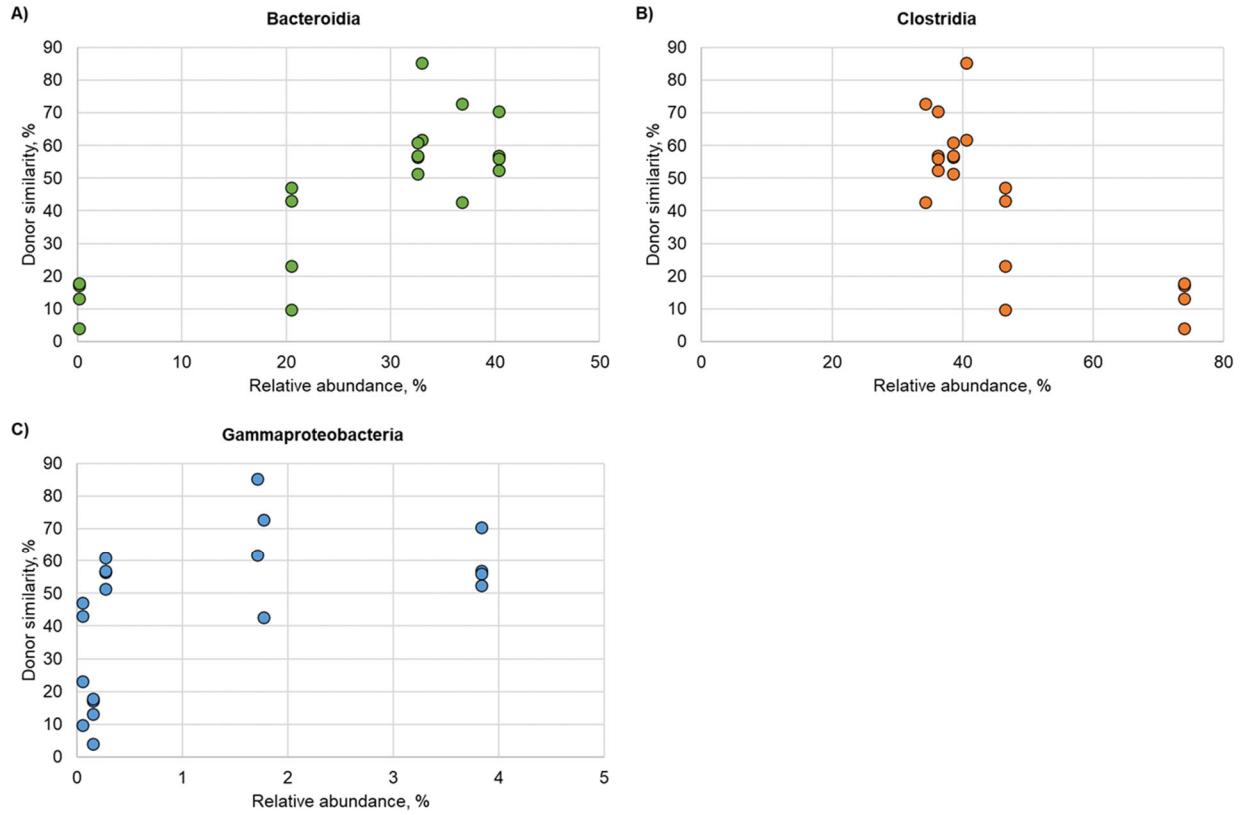

**Figure S5.** Correlation plots showing relative abundances of A) Bacteroidia, B) Clostridia, and C) Gammaproteobacteria and resulting engraftment in mice (determined by SourceTracker).
