# Supplementary material for: Donor Microbiota Composition and Housing Affect Recapitulation of Obese Phenotypes in a Human Microbiota-Associated Murine Model
Source: PubMed Central journal article supplement (PMC7937608; doi:10.3389/fcimb.2021.614218), 2021-02-22
Supplement: Table_1.pdf [file Table_1.pdf]

**Table S1.** Donor demographic characteristics.

| <b>Donor</b> | <b>Sex</b> | <b>Age</b> | <b>BMI<br/>(kg m<sup>-2</sup>)</b> |
|--------------|------------|------------|------------------------------------|
| Ln1          | Male       | 74         | 22                                 |
| Ln2          | Male       | 28         | 22                                 |
| Ln3          | Male       | 33         | 21                                 |
| Ob1          | Female     | 62         | 32                                 |
| Ob2          | Male       | 61         | 49                                 |
| Ob3          | Female     | 49         | 46                                 |
