# Supplementary material for: Donor Microbiota Composition and Housing Affect Recapitulation of Obese Phenotypes in a Human Microbiota-Associated Murine Model
Source: PubMed Central journal article supplement (PMC7937608; doi:10.3389/fcimb.2021.614218), 2021-02-22
Supplement: Table_2.pdf [file Table_2.pdf]

**Table S2.** Donor engraftment (mean  $\pm$  standard deviation) among conventionally housed mice, as determined by SourceTracker. Values sharing the same letter did not differ significantly by Tukey's *post-hoc* test ( $P > 0.05$ ), where A had the highest engraftment and J the lowest. The final row shows all samples at all time points pooled by donor.

| Sex                        | Time (days) | Obese                          |                               |                                | Lean                           |                               |                                |
|----------------------------|-------------|--------------------------------|-------------------------------|--------------------------------|--------------------------------|-------------------------------|--------------------------------|
|                            |             | Ob1                            | Ob2                           | Ob3                            | Ln1                            | Ln2                           | Ln3                            |
| Male                       | 3           | 80.4 $\pm$ 4.5 <sup>ABC</sup>  | 26.5 $\pm$ 6.0 <sup>F-J</sup> | 80.3 $\pm$ 36.1 <sup>ABC</sup> | 47.7 $\pm$ 2.4 <sup>C-H</sup>  | 53.2 $\pm$ 1.7 <sup>C-G</sup> | 50.4 $\pm$ 39.9 <sup>C-G</sup> |
|                            | 7           | 40.9 <sup>D-I</sup>            | 7.8 $\pm$ 6.8 <sup>IJ</sup>   | 43.4 $\pm$ 14.8 <sup>D-H</sup> | 65.2 $\pm$ 9.7 <sup>A-E</sup>  | 41.0 $\pm$ 2.9 <sup>D-I</sup> | 34.9 $\pm$ 31.7 <sup>E-J</sup> |
|                            | 16          | 46.1 $\pm$ 9.7 <sup>C-H</sup>  | NC                            | NC                             | 68.4 $\pm$ 4.0 <sup>A-E</sup>  | NC                            | NC                             |
|                            | 27-32       | 37.4 $\pm$ 11.1 <sup>E-I</sup> | 0.0 $\pm$ 0.0 <sup>J</sup>    | 13.0 $\pm$ 7.0 <sup>HIJ</sup>  | 37.3 $\pm$ 1.5 <sup>E-I</sup>  | 42.1 $\pm$ 7.7 <sup>D-I</sup> | 23.6 $\pm$ 14.4 <sup>F-J</sup> |
| Female                     | 3           | 46.4 $\pm$ 7.4 <sup>C-H</sup>  | 7.9 $\pm$ 5.9 <sup>IJ</sup>   | 95.3 $\pm$ 1.2 <sup>A</sup>    | 40.3 $\pm$ 6.0 <sup>E-I</sup>  | 42.5 $\pm$ 5.1 <sup>D-I</sup> | 92.3 $\pm$ 0.8 <sup>AB</sup>   |
|                            | 7           | 58.6 $\pm$ 8.5 <sup>B-F</sup>  | 0.0 $\pm$ 0.0 <sup>J</sup>    | 75.5 $\pm$ 9.8 <sup>A-D</sup>  | 62.6 $\pm$ 6.0 <sup>A-E</sup>  | 43.6 $\pm$ 4.1 <sup>D-H</sup> | 53.3 $\pm$ 6.8 <sup>C-G</sup>  |
|                            | 16          | 52.2 $\pm$ 3.1 <sup>C-G</sup>  | NC                            | NC                             | 53.2 $\pm$ 14.1 <sup>C-G</sup> | NC                            | NC                             |
|                            | 27-32       | 21.1 $\pm$ 3.1 <sup>G-J</sup>  | 0.0 $\pm$ 0.0 <sup>J</sup>    | 45.4 $\pm$ 3.3 <sup>C-H</sup>  | 14.2 $\pm$ 1.6 <sup>HIJ</sup>  | 35.9 $\pm$ 3.5 <sup>E-H</sup> | 39.5 $\pm$ 2.7 <sup>E-I</sup>  |
| <b>All pooled by donor</b> |             | A                              | B                             | A                              | A                              | A                             | A                              |

NC: sample not collected
