# Supplementary material for: Donor Microbiota Composition and Housing Affect Recapitulation of Obese Phenotypes in a Human Microbiota-Associated Murine Model
Source: PubMed Central journal article supplement (PMC7937608; doi:10.3389/fcimb.2021.614218), 2021-02-22
Supplement: Table_3.pdf [file Table_3.pdf]

**Table S3.** Donor engraftment (mean  $\pm$  standard deviation) among mice housed in SPF conditions, as determined by SourceTracker. Values sharing the same letter did not differ significantly by Tukey's *post-hoc* test ( $P > 0.05$ ), where A had the highest engraftment and G the lowest. The final row shows all samples at all time points pooled by donor.

| Sex                 | Time (days) | Obese                          |                                | Lean                           |                               |
|---------------------|-------------|--------------------------------|--------------------------------|--------------------------------|-------------------------------|
|                     |             | Ob1                            | Ob2                            | Ln1                            | Ln2                           |
| Male                | 3           | 44.2 $\pm$ 6.4 <sup>B-E</sup>  | 22.9 $\pm$ 5.2 <sup>E-G</sup>  | 52.6 $\pm$ 3.3 <sup>A-D</sup>  | 10.7 $\pm$ 0.7 <sup>FG</sup>  |
|                     | 7           | 67.7 $\pm$ 5.1 <sup>AB</sup>   | 0.0 $\pm$ 0.0 <sup>G</sup>     | 61.3 $\pm$ 3.1 <sup>AB</sup>   | 31.4 $\pm$ 5.3 <sup>C-F</sup> |
|                     | 27-32       | 78.1 $\pm$ 3.2 <sup>A</sup>    | 0.3 $\pm$ 0.6 <sup>G</sup>     | 73.2 $\pm$ 3.4 <sup>AB</sup>   | 27.4 $\pm$ 3.0 <sup>C-G</sup> |
| Female              | 3           | 30.6 $\pm$ 15.4 <sup>C-F</sup> | 5.3 $\pm$ 7.9 <sup>FG</sup>    | 52.0 $\pm$ 15.0 <sup>A-E</sup> | 23.5 $\pm$ 6.1 <sup>D-G</sup> |
|                     | 7           | 77.9 $\pm$ 5.1 <sup>A</sup>    | 30.3 $\pm$ 38.5 <sup>C-F</sup> | 68.0 $\pm$ 6.7 <sup>AB</sup>   | 4.2 $\pm$ 5.6 <sup>FG</sup>   |
|                     | 27-32       | 70.5 $\pm$ 6.8 <sup>AB</sup>   | 0.0 $\pm$ 0.0 <sup>G</sup>     | 56.0 $\pm$ 2.1 <sup>ABC</sup>  | 31.8 $\pm$ 2.6 <sup>C-F</sup> |
| All pooled by donor |             | A                              | C                              | A                              | B                             |
